# Supplementary material for: AI-based analysis of Ki-67-positivity and cell density in therapy refractory rheumatoid arthritis
Source: Research Square preprint supplement (doi:10.21203/rs.3.rs-8580369/v1), 2026-02-22
Supplement: Supplementary file 1 [file 37e0a473e22a88e59e40c4e4.xlsx]

## Sheet: Tabelle1
H-number	Total cell count/HPF	Ki-67 (%)	time manual (s)	time with AI (s)
20/30679	2199	33	80	4.8
21/34870	2018	23.6	65.8	4.7
22/53670	3667	26	119	4.8
22/80367	1824	24.5	90.6	4.5
23/28111	675	47.5	66	4.6
