# Supplementary material for: AI-based analysis of Ki-67-positivity and cell density in therapy refractory rheumatoid arthritis
Source: Research Square preprint supplement (doi:10.21203/rs.3.rs-8580369/v1), 2026-02-22
Supplement: Supplementary file 1 [file be51f4a50df563e01e7f8656.docx]

| **Descriptive Statistics** | | | | | |
| --- | --- | --- | --- | --- | --- |
|  | Group | | | Statistic | Standard Error |
| Ki-67 % | therapy-refractory high-grade | Mean | | 19,4032 | 1,82407 |
| 95% Confidence Interval of the Mean | Lower Bound | 15,6203 |  |
| Upper Bound | 23,1861 |  |
| 5% Trimmed Mean | | 18,5950 |  |
| Median | | 17,7737 |  |
| Variance | | 76,526 |  |
| Standard Deviation | | 8,74792 |  |
| Minimum | | 7,45 |  |
| Maximum | | 47,56 |  |
| Range | | 40,10 |  |
| Interquartile Range | | 10,81 |  |
| Skewness | | 1,567 | 0,481 |
| Kurtosis | | 3,823 | 0,935 |
| nontherapy-refractory high-grade | Mean | | 21,5253 | 2,21865 |
| 95% Confidence Interval of the Mean | Lower Bound | 17,0212 |  |
| Upper Bound | 26,0294 |  |
| 5% Trimmed Mean | | 20,0066 |  |
| Median | | 19,9298 |  |
| Variance | | 177,206 |  |
| Standard Deviation | | 13,31189 |  |
| Minimum | | 6,22 |  |
| Maximum | | 80,49 |  |
| Range | | 74,27 |  |
| Interquartile Range | | 11,51 |  |
| Skewness | | 2,659 | 0,393 |
| Kurtosis | | 10,456 | 0,768 |
| osteoarthritis low-grade | Mean | | 4,1666 | 0,82904 |
| 95% Confidence Interval of the Mean | Lower Bound | 2,4425 |  |
| Upper Bound | 5,8907 |  |
| 5% Trimmed Mean | | 3,6810 |  |
| Median | | 3,3845 |  |
| Variance | | 15,121 |  |
| Standard Deviation | | 3,88855 |  |
| Minimum | | 0,30 |  |
| Maximum | | 17,36 |  |
| Range | | 17,06 |  |
| Interquartile Range | | 3,90 |  |
| Skewness | | 2,095 | 0,491 |
| Kurtosis | | 5,587 | 0,953 |
| Gesamtzellzahl/HPF | therapy-refractory high-grade | Mean | | 2293,13 | 253,210 |
| 95% Confidence Interval of the Mean | Lower Bound | 1768,01 |  |
| Upper Bound | 2818,26 |  |
| 5% Trimmed Mean | | 2253,03 |  |
| Median | | 2097,00 |  |
| Variance | | 1474650,119 |  |
| Standard Deviation | | 1214,352 |  |
| Minimum | | 399 |  |
| Maximum | | 4977 |  |
| Range | | 4578 |  |
| Interquartile Range | | 2282 |  |
| Skewness | | 0,496 | 0,481 |
| Kurtosis | | -0,410 | 0,935 |
| nontherapy-refractory high-grade | Mean | | 1445,64 | 123,726 |
| 95% Confidence Interval of the Mean | Lower Bound | 1194,46 |  |
| Upper Bound | 1696,82 |  |
| 5% Trimmed Mean | | 1411,01 |  |
| Median | | 1256,50 |  |
| Variance | | 551094,237 |  |
| Standard Deviation | | 742,357 |  |
| Minimum | | 504 |  |
| Maximum | | 3307 |  |
| Range | | 2803 |  |
| Interquartile Range | | 1219 |  |
| Skewness | | 0,731 | 0,393 |
| Kurtosis | | -0,438 | 0,768 |
| osteoarthritis low-grade | Mean | | 1313,00 | 129,902 |
| 95% Confidence Interval of the Mean | Lower Bound | 1042,85 |  |
| Upper Bound | 1583,15 |  |
| 5% Trimmed Mean | | 1302,56 |  |
| Median | | 1256,50 |  |
| Variance | | 371239,714 |  |
| Standard Deviation | | 609,294 |  |
| Minimum | | 432 |  |
| Maximum | | 2389 |  |
| Range | | 1957 |  |
| Interquartile Range | | 1055 |  |
| Skewness | | 0,312 | 0,491 |
| Kurtosis | | -1,104 | 0,953 |

Supplementary Table S1: Descriptive Statistics – Ki-67 Positivity in %, Total Cell Count/HPF. Groups:
1 = therapy-refractory high-grade synovitis; 2 = non-therapy-refractory high-grade synovitis; 3 = low-grade osteoarthritis.

|  | | Time difference (s) | Time manual (s) | Time with AI (s) |
| --- | --- | --- | --- | --- |
| N |  | 5 | 5 | 5 |
| Mean | | 79,6000 | 84,280 | 4,680 |
| Median | | 75,2000 | 80,000 | 4,700 |
| Std. Deviation | | 21,97874 | 22,0194 | 0,1304 |
| Skewness | | 1,148 | 1,156 | -0,541 |
| Standard Error of Skewness | | 0,913 | 0,913 | 0,913 |
| Minimum | | 61,10 | 65,8 | 4,5 |
| Maximum | | 114,20 | 119,0 | 4,8 |
| Percentiles | 25 | 61,2500 | 65,900 | 4,550 |
| 50 | 75,2000 | 80,000 | 4,700 |
| 75 | 100,1500 | 104,800 | 4,800 |

*Supplementary Table S2: Descriptive Statistics – Time measurement – therapy-refractory high-grade synovitis.*

|  | | Time difference (s) | Time manual (s) | Time with AI (s) |
| --- | --- | --- | --- | --- |
| N |  | 5 | 5 | 5 |
| Mean | | 3,8200 | 8,300 | 4,480 |
| Median | | 3,4000 | 8,600 | 4,300 |
| Std. Deviation | | 3,63758 | 3,5644 | 0,4087 |
| Skewness | | 0,563 | 0,323 | 2,070 |
| Standard Error of Skewness | | 0,913 | 0,913 | 0,913 |
| Minimum | | -0,80 | 3,6 | 4,2 |
| Maximum | | 9,30 | 13,5 | 5,2 |
| Percentiles | 25 | 1,0000 | 5,350 | 4,250 |
| 50 | 3,4000 | 8,600 | 4,300 |
| 75 | 6,8500 | 11,100 | 4,800 |

*Supplementary Table S3: Descriptive Statistics – Time measurement – low-grade osteoarthritis.*

| **Tests for Normal Distribution** | | | | | |  |  |
| --- | --- | --- | --- | --- | --- | --- | --- |
|  | Group | Kolmogorov-Smirnova | | | Shapiro-Wilk | | |
| Statistic | df | Significance | Statistic | df | Significance |
| Ki-67 % | therapy-refractory high-grade | 0,166 | 23 | 0,098 | 0,885 | 23 | 0,013 |
| nontherapy-refractory high-grade | 0,212 | 36 | 0,000 | 0,761 | 36 | 0,000 |
| osteoarthritis low-grade | 0,173 | 22 | 0,084 | 0,791 | 22 | 0,000 |
| Total cell count / HPF | therapy-refractory high-grade | 0,158 | 23 | 0,143 | 0,958 | 23 | 0,418 |
| nontherapy-refractory high-grade | 0,150 | 36 | 0,040 | 0,915 | 36 | 0,009 |
| osteoarthritis low-grade | 0,139 | 22 | 0,200* | 0,942 | 22 | 0,217 |

Supplementary Table S4: Test for normal distribution using Kolmogorov–Smirnov and Shapiro–Wilk tests;
a. Significance correction according to Lilliefors.
