# Supplementary material for: AI-based analysis of Ki-67-positivity and cell density in therapy refractory rheumatoid arthritis
Source: Research Square preprint supplement (doi:10.21203/rs.3.rs-8580369/v1), 2026-02-22
Supplement: Supplementary file 2 [file a4bc5d5d98bda73b5ee65fd5.xlsx]

## Sheet: Tabelle1
H-number	Total cell count/HPF	Ki-67 (%)	time manual (s)	time with AI (s)
20/55118	2311	0.3	7.1	4.3
21/10689	2161	1.5	8.6	5.2
21/41238	1452	1.2	13.5	4.2
22/6761	1492	0.8	8.7	4.3
23/89000	690	1.3	3.6	4.4
