# Supplementary material for: AI-based analysis of Ki-67-positivity and cell density in therapy refractory rheumatoid arthritis
Source: Research Square preprint supplement (doi:10.21203/rs.3.rs-8580369/v1), 2026-02-22
Supplement: Supplementary file 4 [file bf04cc32cbf02db05f63a6c0.xlsx]

## Sheet: patient data
	TRS	non-TRS	OA	total
n	23	36	22	86
mean age (years)	44	52	59	61
median age (years)	51	51	61	55
sex (male/female/unknown)	11/12/0	9/27/0	7/14/1	29/46/1
medication
MTX		7	3	12
MTX+leflunomide		1		2
MTX+TNF-alpha-inhibitor	1			1
MTX+other		1		1
adalimumab	1			1
certolizumab	1			1
leflunomide	2			2
tofacitinib	1	1		1
retuximab	1			1
upadacitinib		2		2
tocilizumab		1		1
baricitinib		1		1
baricitinib/quensyl		1		1
secunimab		1		1
alpha-IL-17-antibody		1		1
JAK-inhibitor	1			2
"basis medication"				1
"multiple biologicals"	2			2
unknown/none	13	19	19	51
joint
knee	18	12	14	48
hip	1	1	3	5
shoulder		3	1	4
elbow		4		4
MTP-joint	1			1
ankle	1			1
hand		7		8
big toe		1		1
unknown	2	8	5	15

## Sheet: TRS
nr	sex	age	joint	SC	IMSYC	GSS	Ki-67 (%)	total cell count
20_10467	1	69	1	6	11	17	12.8224	3993
20_1382	2	26	1	6	9	15	10.956	931
20_2215	2	24	7	7	7	14	25.8145	399
20_23973	2	59	8	8	9	17	22.3445	4180
20_30679	1	51	1	8	11	19	33.015	2199
20_59038	2	21	1	6	9	15	18.1338	1136
21_34870	1	18	2	6	6	12	23.6373	2018
21_80367	1	57	1	7	-	-	24.4518	1824
21_84030	2	41	7	8	9	17	11.7424	2112
22_33531	2	57	6	8	10	18	21.803	3472
22_3438	2	55	4	7	-	-	9.29587	2883
22_3789	2	24	1	7	10	17	12.5894	2097
22_53670	1	71	2	8	10	18	26.9703	3667
22_60104	1	40	1	5	7	12	16.0082	1949
22_75491	2	62	4	8	-	-	17.1353	2276
22_7688	2	55	4	8	8	16	17.3109	1190
22_83034	2	2	1	7	7	14	13.3086	3509
23_15686	1	26	1	7	9	16	16.048	1832
23_18649	2	67	1	5	8	13	7.45429	4977
23_26176	1	29	1	7	8	15	17.7841	1760
23_28111	1	34	1	7	11	18	47.5556	675
23_54351	1	68	1	4	5	9	22.3185	923
23_54352	1	59	8	7	8	15	17.7737	2740

## Sheet: non-TRS
nr	sex	age	joint	SC	IMSYC	GSS	Ki-67 (%)	total cell count
20_56195	2	40	5	6	6	12	10.8417	1402
20_20067	1	51	1	8	9	17	26.6319	1915
20_18304	2	50	3	6	8	14	15.3846	741
20_13513	1	33	1	6	8	14	16.8317	909
20_55786	2	21	1	5	6	11	18.9335	1294
20_52577	2	47	1	7	9	16	17.5278	1529
20_27209	2	36	1	5	8	13	6.21716	1142
20_50942	2	47	8	6	9	15	9.23803	1483
21_29325	2	46	1	8	9	17	8.65613	2530
21_28221	2	64	1	5	8	13	26.1732	1513
21_26019	2	49	8	5	8	13	15.3646	768
21_29327	2	67	5	7	7	14	17.688	718
21_66315	2	62	1	7	8	15	38.2482	1370
21_20066	2	54	1	5	9	14	9.70948	2616
21_12330	2	73	1	8	10	18	17.3954	2127
21_8863	2	41	5	8	9	17	18.1083	2474
21_54244	2	62	5	9	7	16	24.6939	980
21_71057	2	82	5	8	12	20	43.0486	597
21_78809	2	60	1	6	7	13	8.3	1000
21_86150	2	63	5	9	8	17	22.4269	923
21_33994	2	43	7	9	7	16	23.6111	504
21_14203	1	43	3	8	10	18	20.8604	2464
21_56384	2	61	8	5	7	12	12.0858	513
22_76622	1	44	8	7	8	15	25.4309	3307
22_72765	2	32	2	6	7	13	23.3333	1050
22_10466	2	32	4	8	9	17	27.9742	2631
22_5616	1	74	4	8	8	16	18.9991	2258
22_79656	2	33	8	7	7	14	80.4878	533
22_75513	1	24	1	7	9	16	20.8925	2465
22_48874	2	75	4	7	8	15	23.3533	1503
22_11189	2	48	4	5	4	9	6.94143	922
23_52405	2	60	3	6	9	15	12.1542	1193
23_89363	2	37	1	7	9999	9999	39.1304	1219
23_89002	1	60	2	6	9999	9999	21.9833	837
23_88896	2	66	7	7	9999	9999	22.4747	792
23_36207	1	47	1	8	10	18	23.7781	1821

## Sheet: OA
nr	sex	age	joint	SC	IMSYC	GSS	Ki-67 (%)	total cell count
20_22867	2	47	1	3	4	7	1.47601	1084
20_55118	1	77	2	2	3	5	0.302899	2311
20_84713	2	57	8	3	6	9	6.98565	1045
21_10689	2	45	1	4	4	8	1.52707	2161
21_17340	2	36	2	4	3	7	17.3611	432
21_19916	2	38	1	3	4	7	1.92549	2389
21_41238	1	31	3	3	3	6	1.1708	1452
21_4373	2	74	8	3	5	8	5.61024	2032
21_4835	1	62	1	3	5	8	5.27086	1366
21_62739	2	67	8	3	5	8	10.371	1186
21_8964	2	80	1	3	6	9	3.38137	1804
22_44410	2	53	8	3	6	9	5.07614	788
22_49412	1	54	8	3	2	5	4.57627	1770
22_6716	1	65	1	4	6	10	0.80429	1492
23_46356	2	78	1	4	4	8	1.77485	1972
23_53129	1	70	1	3	9999	9999	1.88395	1327
23_88577	2	55	3	3	9999	9999	7.29313	713
23_89000	2	50	1	3	9999	9999	1.30435	690
23_90252	1	75	1	3	9999	9999	1.38889	432
23_90331	2	70	1	4	9999	9999	4.79798	792
23_91181	3	63	1	3	9999	9999	3.3877	797
23_92906	2	60	8	3	9999	9999	3.9953	851

## Sheet: legend
sex	joint
m=1	knee=1
w=2	hip=2
u=3	shoulderr=3
	elbow=4
	hand=5
	ankle=6
	small joints=7
	unknown=8
