# Supplementary material for: AI-based analysis of Ki-67-positivity and cell density in therapy refractory rheumatoid arthritis
Source: Research Square preprint supplement (doi:10.21203/rs.3.rs-8580369/v1), 2026-02-22
Supplement: Supplementary file 5 [file c32090c61325b91f4fe57850.xlsx]

## Sheet: Tabelle1
H-Number	Ki67-pos	Ki67-neg	Total cells	Percent pos (%)
23/54352	487	2253	2740	17.7737
22/53670	989	2678	3667	26.9703
22/3438	268	2615	2883	9.29587
22/33531	757	2715	3472	21.803
22/75491	390	1886	2276	17.1353
22/83034	467	3042	3509	13.3086
23/18649	371	4606	4977	7.45429
20/30679	726	1473	2199	33.015
20/23973	934	3246	4180	22.3445
20/10467	512	3481	3993	12.8224
20/1382	102	829	931	10.956
21/34870	477	1541	2018	23.6373
22/60104	312	1637	1949	16.0082
23/26176	313	1447	1760	17.7841
23/28111	321	354	675	47.5556
21/84030	248	1864	2112	11.7424
22/7688	206	984	1190	17.3109
21/80367	446	1378	1824	24.4518
20/59038	206	930	1136	18.1338
23/54351	206	717	923	22.3185
22/3789	264	1833	2097	12.5894
20/2215	103	296	399	25.8145
23/15686	294	1538	1832	16.048
Mean			2293.13	19.4032
Median			2097	17.7737
Min			399	7.45429
Max			4977	47.5556
