# Supplementary material for: AI-based analysis of Ki-67-positivity and cell density in therapy refractory rheumatoid arthritis
Source: Research Square preprint supplement (doi:10.21203/rs.3.rs-8580369/v1), 2026-02-22
Supplement: Supplementary file 6 [file dd4291a3dbb2a2e88ca0b0a7.xlsx]

## Sheet: Tabelle1
H-Number	Ki67-pos	Ki67-neg	Total cells	Percent Ki67 pos (%)
20/13513	153	756	909	16.8317
20/18304	114	627	741	15.3846
20/20067	510	1405	1915	26.6319
20/27209	71	1071	1142	6.21716
20/50942	137	1346	1483	9.23803
20/52577	268	1261	1529	17.5278
20/55786	245	1049	1294	18.9335
20/56195	152	1250	1402	10.8417
21/12330	370	1757	2127	17.3954
21/14203	514	1950	2464	20.8604
21/20066	254	2362	2616	9.70948
21/26019	118	650	768	15.3646
21/28221	396	1117	1513	26.1732
21/29325	219	2311	2530	8.65613
21/29327	127	591	718	17.688
21/33994	119	385	504	23.6111
21/54244	242	738	980	24.6939
21/56384	62	451	513	12.0858
21/66315	524	846	1370	38.2482
21/71057	257	340	597	43.0486
21/78809	83	917	1000	8.3
21/86150	207	716	923	22.4269
21/8863	448	2026	2474	18.1083
22/10466	736	1895	2631	27.9742
22/11189	64	858	922	6.94143
22/48874	351	1152	1503	23.3533
22/5616	429	1829	2258	18.9991
22/72765	245	805	1050	23.3333
22/75513	515	1950	2465	20.8925
22/76622	841	2466	3307	25.4309
22/79656	429	104	533	80.4878
23/36207	433	1388	1821	23.7781
23/52405	145	1048	1193	12.1542
23/88896	178	614	792	22.4747
23/89002	184	653	837	21.9833
23/89363	477	742	1219	39.1304
Mean			1445.64	21.5253
Median			1256.5	19.9298
Min			504
Max			3307
