# Supplementary material for: AI-based analysis of Ki-67-positivity and cell density in therapy refractory rheumatoid arthritis
Source: Research Square preprint supplement (doi:10.21203/rs.3.rs-8580369/v1), 2026-02-22
Supplement: Supplementary file 7 [file fd1f32ec80ad287981f73430.xlsx]

## Sheet: Tabelle1
H-Number	Ki67-pos	Ki67-neg	Total cells	Percent pos (%)	note
20/22867	16	1068	1084	1.47601
20/55118	7	2304	2311	0.302899
20/84713	73	972	1045	6.98565
22/49412	81	1689	1770	4.57627
22/6716	12	1480	1492	0.80429
21/19916	46	2343	2389	1.92549
21/41238	17	1435	1452	1.1708
21/62739	123	1063	1186	10.371
21/8964	61	1743	1804	3.38137
21/4373	114	1918	2032	5.61024
21/4835	72	1294	1366	5.27086
21/10689	33	2128	2161	1.52707
21/17340	75	357	432	17.3611
23/53129	25	1302	1327	1.88395
23/89000	9	681	690	1.30435
23/88577	52	661	713	7.29313
23/90252	6	426	432	1.38889
23/90331	38	754	792	4.79798
23/91181	27	770	797	3.3877
23/92906	34	817	851	3.9953
23/46356	35	1937	1972	1.77485	lymph follicles
22/44410	40	748	788	5.07614
Mean			1313	4.16661
Median			1256.5	3.38454
Min			432	0.302899
Max			2389	17.3611
